# Supplementary material
Source: PubMed Central journal article supplement (PMC8133765)

# THE LANCET

## Infectious Diseases

### Supplementary appendix

This appendix formed part of the original submission and has been peer reviewed. We post it as supplied by the authors.

Supplement to: Ramanathan M, Ferguson ID, Miao W, Khavari PA. SARS-CoV-2 B.1.1.7 and B.1.351 spike variants bind human ACE2 with increased affinity. *Lancet Infect Dis* 2021; published online May 19. [https://doi.org/10.1016/S1473-3099\(21\)00262-0](https://doi.org/10.1016/S1473-3099(21)00262-0).

## Materials and Methods

### Recombinant Proteins

Human ACE2 protein was purchased from Sino Biological (SinoBiological, catalog#10108-H05H) and re-suspended in PBS-T to obtain 4.54uM stock concentration. Recombinant Spike Receptor Binding Domains were ordered from BEI resources. Protein quality was determined using a Tycho NT.6 (**Figures S4 & S5**) (NanoTemper Technologies). Human hnRNPC was purchased from Abnova (catalog# H00003183P01S.)

### Microscale Thermophoresis

Spike RBD proteins were labeled using Monolith His-Tag Labeling Kit RED-tris-NTA (NanoTemper Technologies) following manufacturer protocol at 2:1 protein to dye ratio. Briefly, 100 uL of 200nM Spike RBD (Hu-1 or B.1.1.7 or B.1.351 RBD) was mixed with 100 uL of 100nM dye for 30 minutes at room temperature, followed by centrifugation for 10 minutes at 15000g at 4C. A series of sixteen 1:1 dilutions of hACE2 were prepared, with 2.27uM the highest concentration. Each dilution of hACE2 was mixed with one volume of Spike labeling reaction mix prior to incubation for 5 minutes at room temperature. Mixed samples were loaded into Monolith NT.115 Capillaries (NanoTemper Technologies). As a specificity control, hnRNPC was utilized instead of hACE2; MST showed no binding (**Figure S6**). MST was performed using a Monolith NT.115 instrument (NanoTemper Technologies) at room temperature, with 60-80% excitation power and Medium MST power.

### Statistical Analyses

All statistical analyses were performed with GraphPad Prism 8.4 (Graphpad Software Inc.). Student's t-test was performed to compare the binding affinity of SCoV2 and variants with human ACE2 protein.

### Acknowledgements

The following reagent was produced under HHSN272201400008C and obtained through BEI Resources, NIAID, NIH: Spike Glycoprotein Receptor Binding Domain (RBD) from SARS-Related Coronavirus 2, Hu-1 with C-Terminal Histidine Tag, Recombinant from HEK293F Cells, NR-52366. The following reagents were obtained through BEI Resources, NIAID, NIH: Spike Glycoprotein Receptor Binding Domain (RBD) from SARS-Related Coronavirus 2, South Africa Variant (NR-54005) and United Kingdom Variant (NR-54004) with C-Terminal Histidine Tag, Recombinant from HEK293 Cells. This work was supported by the USVA Office of Research and Development I01BX00140908 (P.A.K.), NIH CA142635, AR45192, AR076965 and HG007919 (P.A.K).

```

Wuhan-Hu-1 1 RVQPTEIVRFPNITNLCPFGEVFNATRFASVYAWNRKRISNCVADYSVLYNSASFSTFKCYGVSPTKLNDLCF 74
B.1.1.7 1 RVQPTEIVRFPNITNLCPFGEVFNATRFASVYAWNRKRISNCVADYSVLYNSASFSTFKCYGVSPTKLNDLCF 74
B.1.135 1 RVQPTEIVRFPNITNLCPFGEVFNATRFASVYAWNRKRISNCVADYSVLYNSASFSTFKCYGVSPTKLNDLCF 74

Wuhan-Hu-1 75 TNVYADSFVIRGDEVRQIAPGQTGK IADYNYKLPDDFTGCVIAWNSNNLDSKVGGNYNLYRLLFRKSNLKP FER 148
B.1.1.7 75 TNVYADSFVIRGDEVRQIAPGQTGK IADYNYKLPDDFTGCVIAWNSNNLDSKVGGNYNLYRLLFRKSNLKP FER 148
B.1.135 75 TNVYADSFVIRGDEVRQIAPGQTGN IADYNYKLPDDFTGCVIAWNSNNLDSKVGGNYNLYRLLFRKSNLKP FER 148

Wuhan-Hu-1 149 DISTEIQAGSTPCNGVEGFNCYFPLQSYGFQPTN GVGYPYRVVVLSFELLHAPATVCGPKKSTNLVKNKCVN 222
B.1.1.7 149 DISTEIQAGSTPCNGVEGFNCYFPLQSYGFQPTY GVGYPYRVVVLSFELLHAPATVCGPKKSTNLVKNKCVN 222
B.1.135 149 DISTEIQAGSTPCNGVKGFNCFYFPLQSYGFQPTV GVGYPYRVVVLSFELLHAPATVCGPKKSTNLVKNKCVN 222

Wuhan-Hu-1 223 F 223
B.1.1.7 223 F 223
B.1.135 223 F 223

```

**Figure S1:** Sequence and alignment of RBD proteins assayed. The sequence of the parental Hu-1 strain is used as SCoV2 RBD sequence. Mutations seen in B.1.1.7 and B.1.351 are highlighted.

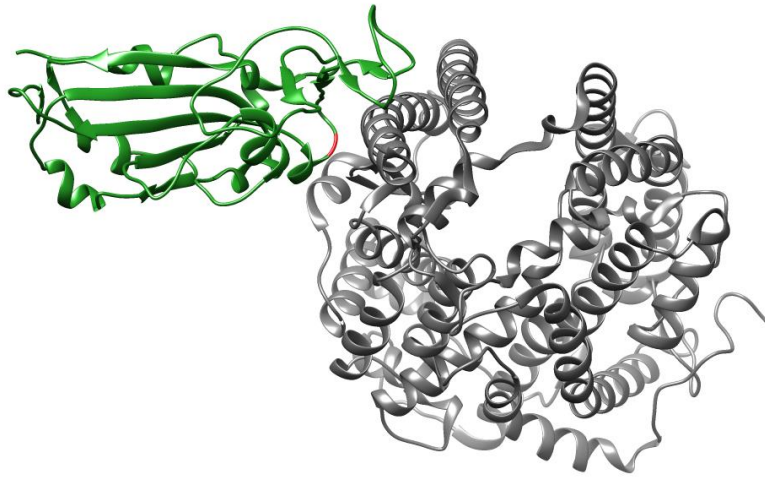

**Figure S2:** Structure of the SARS-CoV-2 RBD (PDB: 6M0J) with B.1.1.7 mutation (N501Y) on RBD colored red. Coloring schema: ACE2 (grey), receptor-binding domain (green)

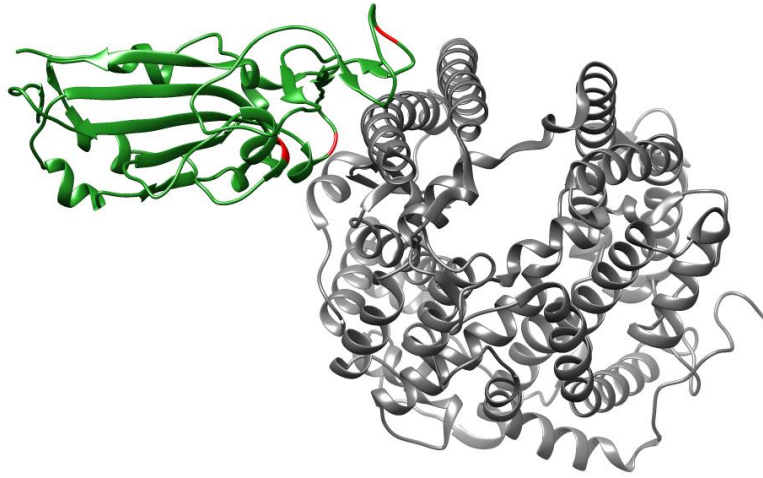

**Figure S3:** Structure of the SARS-CoV-2 RBD (PDB: 6M0J) with B.1.351 mutation (K417N, E484K, N501Y) on RBD colored red. Coloring schema: ACE2 (grey), receptor-binding domain (green)

**Fig. 1 Binding of SARS-CoV-2 Spike RBD with Human ACE2**

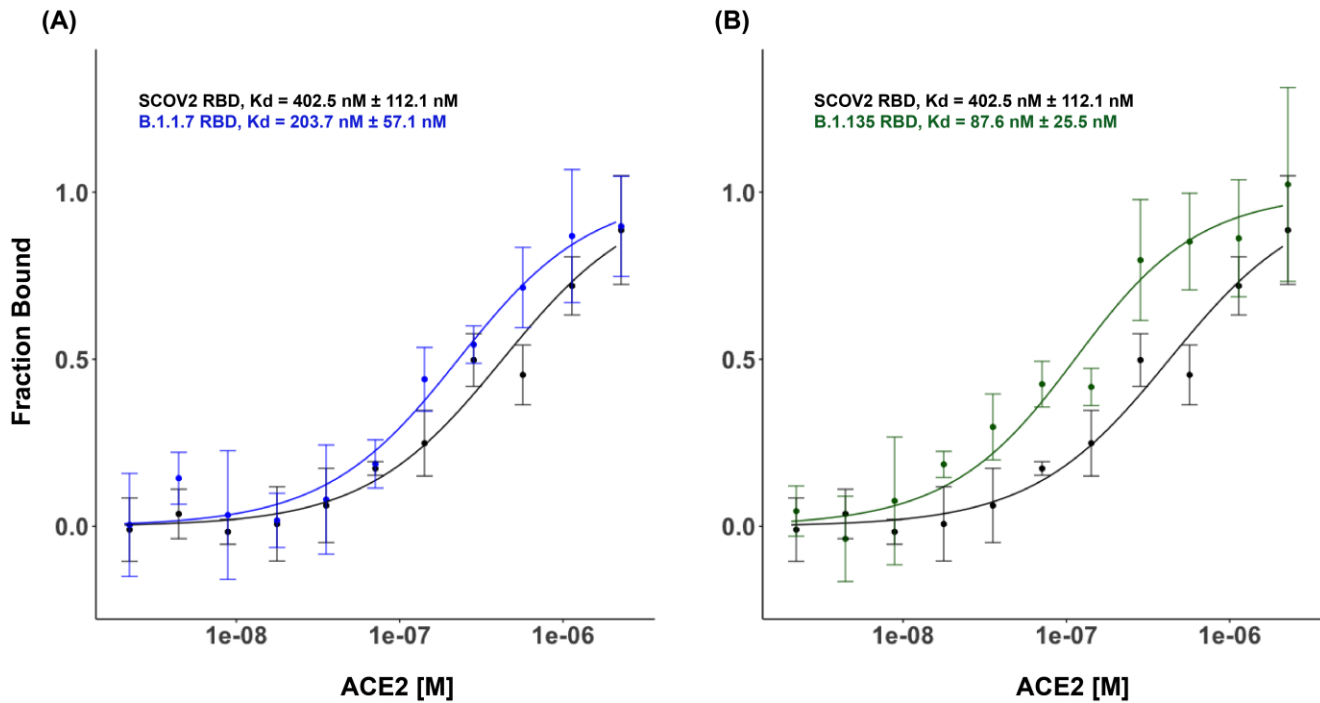

**Fig. 1.** Microscale thermophoresis (MST) with 100nM labeled Spike RBD (A) Binding curve of SCoV2 and B.1.1.7 RBD with a titration series of human ACE2 (n=3 series of independent replicates)  
(B) Binding curve of SCoV2 and B.1.135 RBD with a titration series of human ACE2 (n=3 series of independent replicates).  
MST data are mean ± SD. Error bars=SD

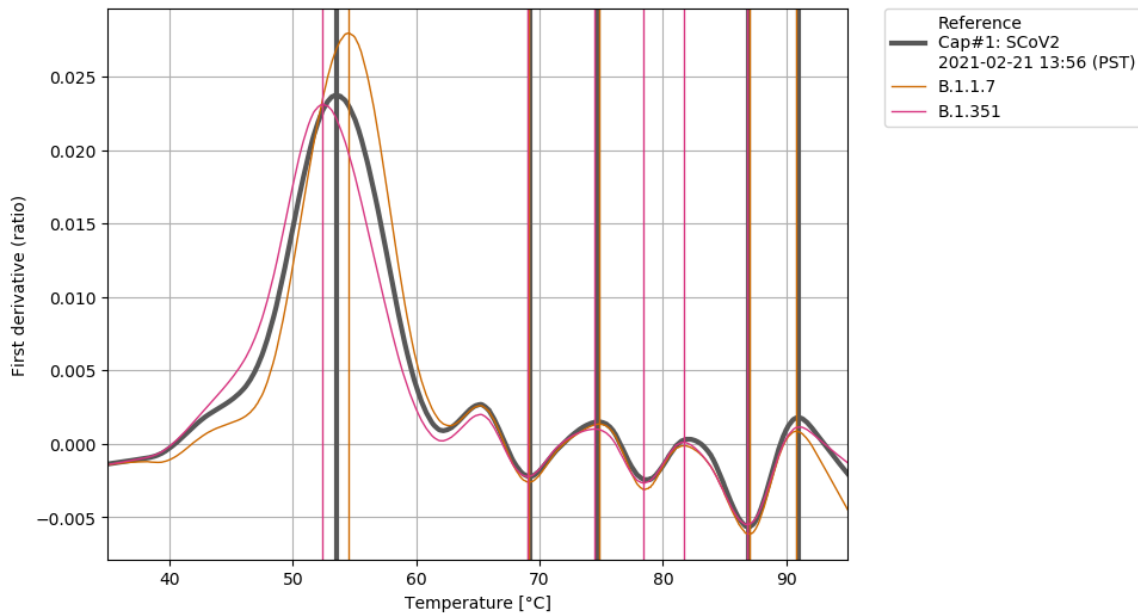

**Figure S4:** Protein quality of RBD proteins assayed. Tycho NT. 6 (Nanotemper) was used to measure changes in intrinsic fluorescence at 330 nm and 350 nm with increasing temperature. The fluorescence signals were plotted as a first derivative of the 350 nm/330 nm ratio.

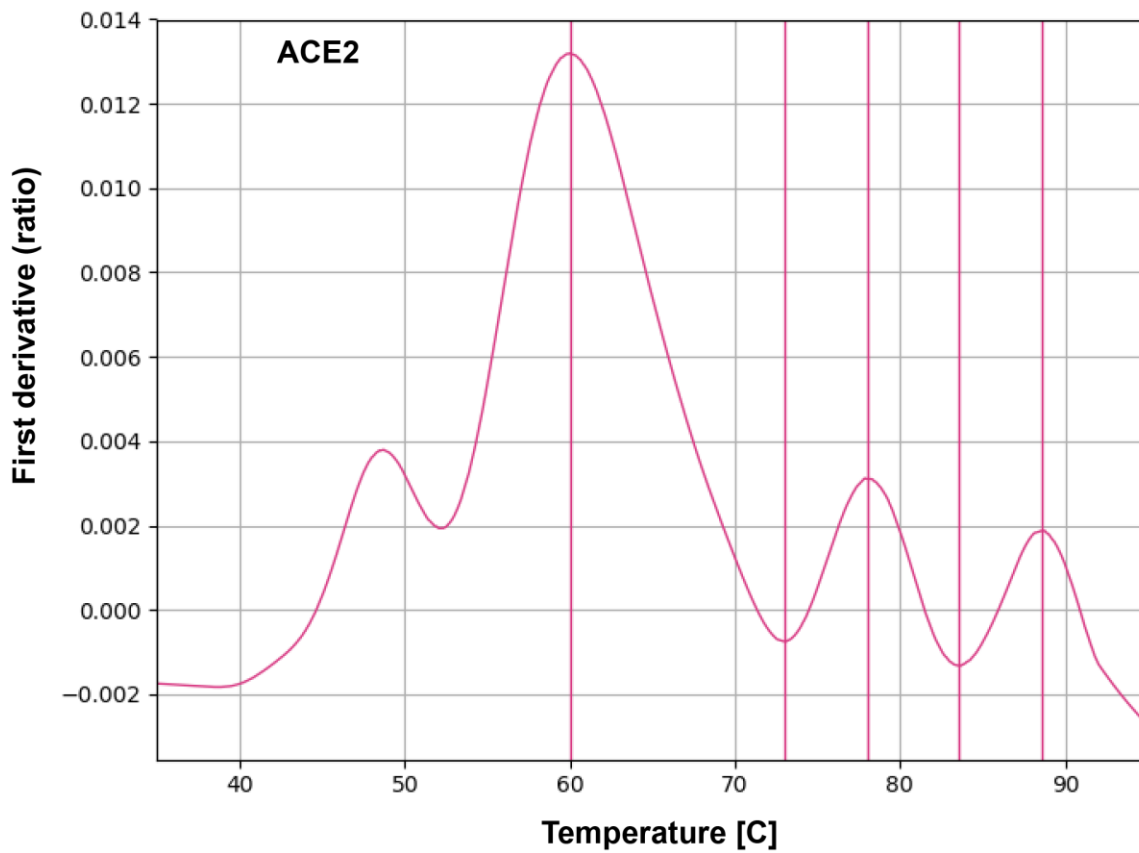

**Figure S5:** Protein quality of ACE2. Tycho NT. 6 (Nanotemper) was used to measure changes in intrinsic fluorescence at 330 nm and 350 nm with increasing temperature. The fluorescence signals were plotted as a first derivative of the 350 nm/330 nm ratio.



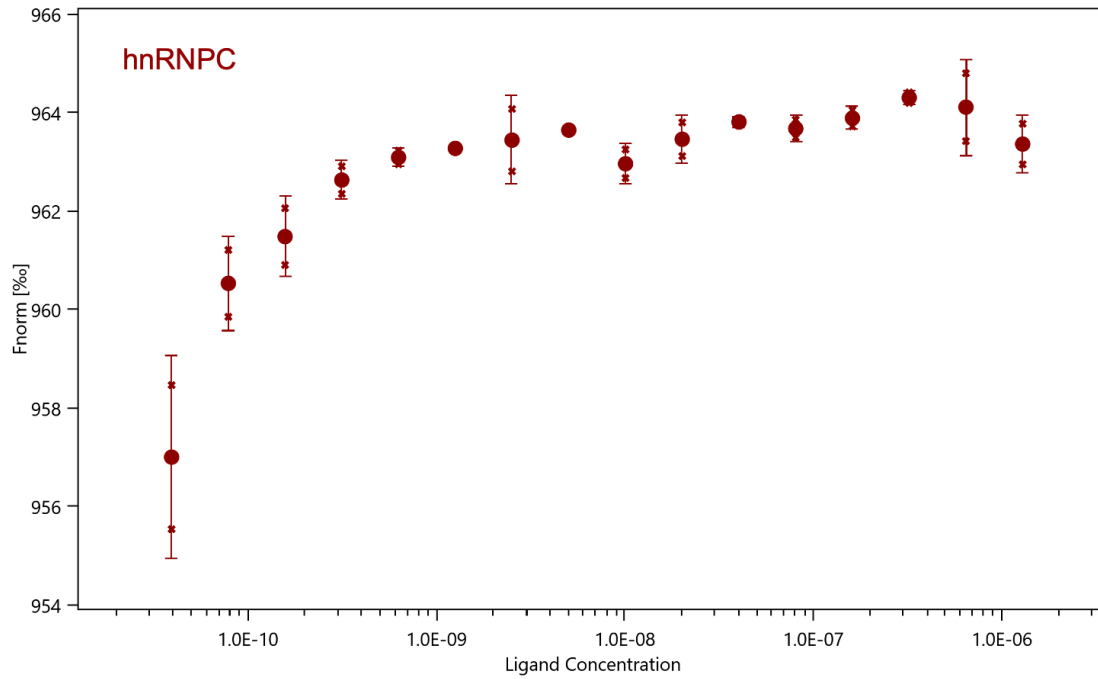

Supplement: mmc1.pdf [file mmc1.pdf]
